# Supplementary material for: Targeted Investigational Oncology Agents in the NCI-60: A Phenotypic Systems–based Resource
Source: PubMed Central journal article supplement — Mol Cancer Ther. 2023 Aug 7;22(11):1270–9. doi: 10.1158/1535-7163.MCT-23-0267 (PMC10618733; doi:10.1158/1535-7163.mct-23-0267), 2023-08-07
Supplement: mct-23-0267_supplementary_figures_1_and_2_suppsf1-2.pdf [file mct-23-0267_supplementary_figures_1_and_2_suppsf1-2.pdf]

| NCIEndpoint | Color  |
|-------------|--------|
| -9          | Red    |
| -7          | Yellow |
| -5          | Green  |

Colored by Value

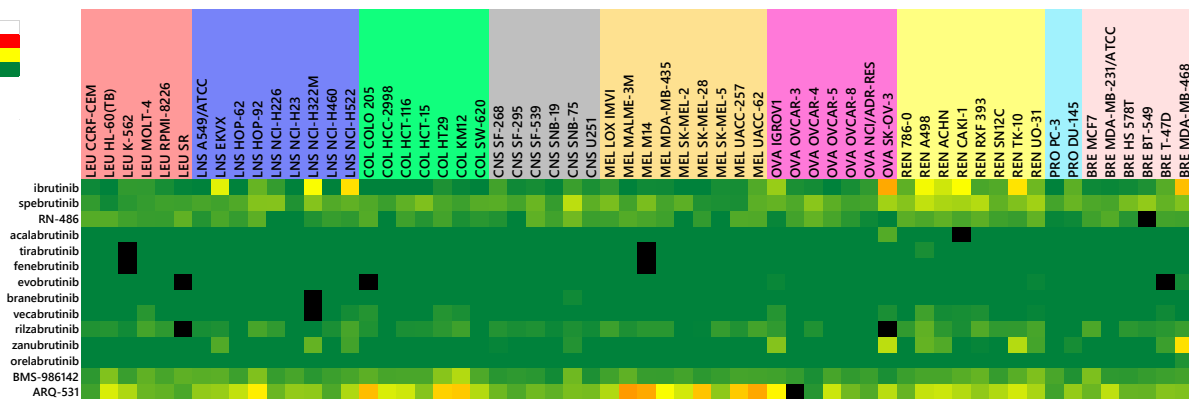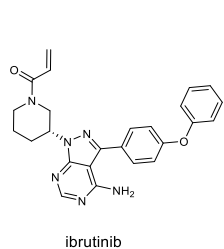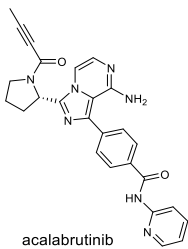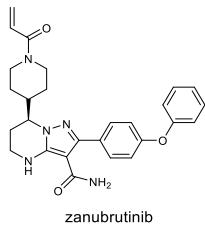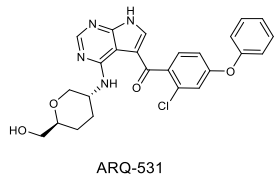

Figure S1.  
BTK inhibitors heat map.

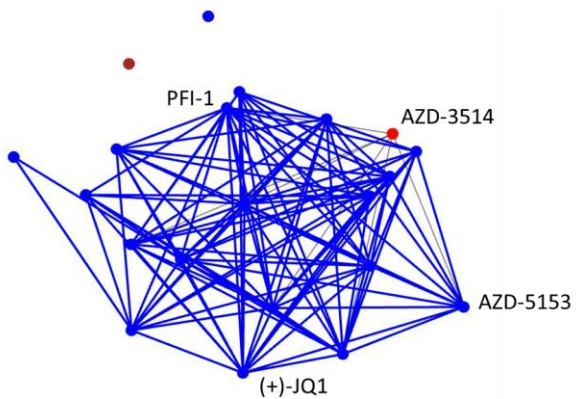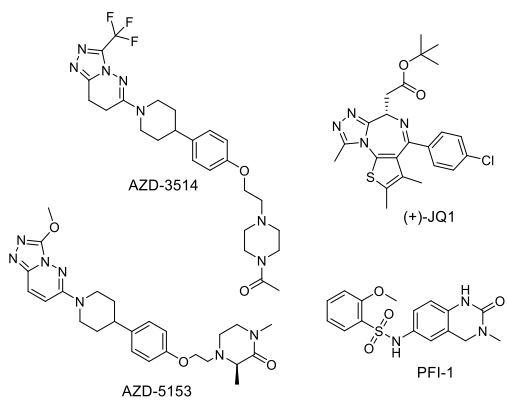

Figure S2.  
Bromodomain inhibitor correlation map cluster.
